# Supplementary material for: Induction of labour at 41 weeks versus expectant management and induction of labour at 42 weeks (SWEdish Post-term Induction Study, SWEPIS): multicentre, open label, randomised, superiority trial
Source: PubMed Central journal article supplement — BMJ. 2019 Nov 20;367:l6131. doi: 10.1136/bmj.l6131 (PMC6939660; doi:10.1136/bmj.l6131), 2019-11-20
Supplement: wenu0515381.ww1.pdf [file wenu0515381.ww1.pdf]

**Supplementary Table A. Study period, number of possible eligible women, number of eligible women and number of included women at the participating centres**

|                                                                                                          | <b>Study period*</b>                   | <b>Number of possible eligible women** during study period</b> | <b>Number of eligible women during study period</b> | <b>Number of included women</b> | <b>Included women/number of possible eligible women</b> | <b>Included women/number of eligible women</b> |
|----------------------------------------------------------------------------------------------------------|----------------------------------------|----------------------------------------------------------------|-----------------------------------------------------|---------------------------------|---------------------------------------------------------|------------------------------------------------|
| <b>Sahlgrenska University Hospital</b>                                                                   | May 20, 2016 to October 15 2018        | 4657                                                           | 3020                                                | 776                             | 16.7%                                                   | 25.7%                                          |
| <b>Uppsala University Hospital</b>                                                                       | February 2, 2017 to October 15, 2018   | 1531                                                           | 1025                                                | 351                             | 22.9%                                                   | 34.2%                                          |
| <b>Falun Hospital</b>                                                                                    | January 23, 2017 to October 15, 2018   | 874                                                            | 565                                                 | 119                             | 13.6%                                                   | 21.1%                                          |
| <b>South Älvsborg Hospital</b>                                                                           | April 6, 2017 to October 15, 2018      | 1038                                                           | 665                                                 | 158                             | 15.2%                                                   | 23.8%                                          |
| <b>Stockholm (Södertälje, Karolinska Solna, Karolinska Huddinge, Danderyd, South BB, South Hospital)</b> | March 28, 2017 to October 15, 2018     | 8934                                                           | 5960                                                | 1122                            | 12.6%                                                   | 18.8%                                          |
| <b>Örebro University Hospital</b>                                                                        | September 9, 2017 to October 15, 2018  | 650                                                            | 416                                                 | 65                              | 10.0%                                                   | 15.6%                                          |
| <b>Halland Hospital, Varberg</b>                                                                         | September 29, 2017 to October 15, 2018 | 585                                                            | 372                                                 | 78                              | 13.3%                                                   | 21.0%                                          |
| <b>Halland Hospital, Halmstad</b>                                                                        | September 25, 2017 to October 15, 2018 | 470                                                            | 305                                                 | 53                              | 11.3%                                                   | 17.4%                                          |
| <b>Visby Hospital</b>                                                                                    | March 2, 2018 to October 15, 2018      | 61                                                             | 39                                                  | 30                              | 49.2%                                                   | 76.9%                                          |
| <b>North Älvsborg Hospital</b>                                                                           | June 13, 2018 to October 15, 2018      | 279                                                            | 187                                                 | 10                              | 3.6%                                                    | 5.3%                                           |
| <b>Total</b>                                                                                             | May 20, 2016 to October 15, 2018       | 19 079                                                         | 12 554                                              | 2760                            | 14.5%                                                   | 22.0%                                          |

\*Most centres stopped recruitment for a period during June, July and August

\*\*Deliveries  $\geq 41$  weeks+0 days, only one delivery per woman, first delivery during the study period, singleton, women  $\geq 18$  years, cephalic presentation. Women with previous caesarean delivery were excluded.

**Supplementary Table B Baseline characteristics of Swedish background population**

\*

| <b>Variable</b>                                                               | <b>Swedish background population (n=49 779)</b> |
|-------------------------------------------------------------------------------|-------------------------------------------------|
| <b>Age at delivery (years)</b>                                                |                                                 |
| Mean (SD)                                                                     | 30.8 (4.9)                                      |
| Median (IQR)                                                                  | 30.6 (27.3; 34.1)                               |
| Age at delivery >=35 years                                                    | 10 149 (20.4%)                                  |
| <b>Parity (includes stillborn and live births)</b>                            |                                                 |
| Nulliparous                                                                   | 25 607 (51.4%)                                  |
| <b>Smoking at first antenatal visit</b>                                       |                                                 |
| No                                                                            | 42 689 (85.8%)                                  |
| Missing                                                                       | 5496 (11.0%)                                    |
| <b>BMI at first antenatal visit</b>                                           |                                                 |
| Mean (SD)                                                                     | 25.1 (4.8)                                      |
| Median (IQR)                                                                  | 24.1 (21.8; 27.4)                               |
| BMI>=30 at first antenatal visit                                              | 6562 (13.2%)                                    |
| BMI missing                                                                   | 4300 (8.6%)                                     |
| <b>Region of birth</b>                                                        |                                                 |
| Sweden                                                                        | 33 384 (67.1%)                                  |
| Other Nordic countries                                                        | 424 (0.9%)                                      |
| Europe outside Nordic countries                                               | 3542 (7.1%)                                     |
| Outside Europe                                                                | 8338 (16.8%)                                    |
| Missing                                                                       | 4091 (8.2%)                                     |
| <b>Highest level of education</b>                                             |                                                 |
| Less than 9 years compulsory school                                           | 1276 (2.6%)                                     |
| 9 years compulsory school                                                     | 2352 (4.7%)                                     |
| High school 10 to 12 years                                                    | 15 512 (31.2%)                                  |
| University or corresponding                                                   | 23 256 (46.7%)                                  |
| Missing                                                                       | 7383 (14.8%)                                    |
| <b>Mode of conception</b>                                                     |                                                 |
| <b>Assisted conception (IVF/ICSI)</b>                                         | 1825 (3.7%)                                     |
| <b>Gestational age (days)</b>                                                 |                                                 |
| Mean (SD)                                                                     | 291 (3)                                         |
| Median (IQR)                                                                  | 290 (288; 293)                                  |
| Gestational age >=42+0 weeks                                                  | 12 129 (24.4%)                                  |
| <b>Birth weight, g</b>                                                        |                                                 |
| Mean (SD)                                                                     | 3815 (452)                                      |
| Median (IQR)                                                                  | 3800 (3500; 4110)                               |
| Missing                                                                       | 194 (0.4%)                                      |
| <b>SGA</b>                                                                    | 899 (1.8%)                                      |
| <b>LGA</b>                                                                    | 971 (2.0%)                                      |
| <b>Stillbirth</b>                                                             | 60 (0.12%)                                      |
| <b>Perinatal mortality (stillbirth and early neonatal death [&lt;7 days])</b> | 70 (0.14%)                                      |

|                                    |             |
|------------------------------------|-------------|
| <b>Apgar score &lt; 4 at 5 min</b> | 172 (0.3%)  |
| <b>Apgar score &lt; 7 at 5 min</b> | 706 (1.4%)  |
| <b>Missing Apgar score</b>         | 156 (0.3%)  |
| <b>Cesarean section</b>            | 4162 (8.4%) |

BMI= body mass index, SGA=small for gestational age ( $\leq -2$  SD according to the sex specific Swedish reference<sup>12</sup>; LGA=large for gestational age ( $\geq 2$  SD according to the sex specific Swedish reference<sup>12</sup>, IVF= in vitro fertilization, ICSI= intracytoplasmic sperm injection

For categorical variables n/N (%) is presented

For continuous variables Mean (standard deviation [SD])/ Median, (interquartile range [IQR] Q1; Q3) is presented

\*From the Swedish Pregnancy Register: Deliveries  $\geq 41$  weeks+0 days in Sweden during the study period between May 15, 2016 and October 15, 2018 (only one delivery per woman, first delivery during the study period), singleton, women  $\geq 18$  years, cephalic presentation. Women with previous caesarean delivery were excluded.

Supplementary Table C Baseline characteristics of per protocol population

| Variable                                            | Induction group<br>(n=1333)               | Expectant<br>management<br>group<br>(n=1351) |
|-----------------------------------------------------|-------------------------------------------|----------------------------------------------|
| Age at randomisation, years                         | 31.3 (4.7)<br>31.1 (28.; 34.6)<br>n=1333  | 31.0 (4.5)<br>30.9 (27.9; 34.2)<br>n=1351    |
| Age at randomisation                                |                                           |                                              |
| Age at randomisation <35 years                      | 1039/1333 (77.9%)                         | 1079/1351 (79.9%)                            |
| Age at randomisation >=35 years                     | 294/1333 (22.1%)                          | 272/1351 (20.1%)                             |
| Parity (includes stillborn and live births)         |                                           |                                              |
| Nulliparous                                         | 729/1333 (54.7%)                          | 742/1351 (54.9%)                             |
| Parous                                              | 604/1333 (45.3%)                          | 609/1351 (45.1%)                             |
| Smoking at first antenatal visit                    |                                           |                                              |
| No                                                  | 1199/1231 (97.4%)                         | 1201/1239 (96.9%)                            |
| 1-9 cig/day                                         | 25/1231 (2.0%)                            | 29/1239 (2.3%)                               |
| 10 or more cig/day                                  | 7/1231 (0.6%)                             | 9/1239 (0.7%)                                |
| Alcohol screening (AUDIT) at first antenatal visit* |                                           |                                              |
| 0-5 points (low risk)                               | 1068/1157 (92.3%)                         | 1084/1164 (93.1%)                            |
| > = 6 (risk behavior)                               | 89/1157 (7.7%)                            | 80/1164 (6.9%)                               |
| Medical history                                     |                                           |                                              |
| Psychiatric disease                                 | 89/957 (9.3%)                             | 106/974 (10.9%)                              |
| Prepregnancy diabetes mellitus type 1 or 2          | 1/1317 (0.1%)                             | 0/1327 (0.0%)                                |
| Endocrine disease                                   | 77/1314 (5.9%)                            | 94/1327 (7.1%)                               |
| Chronic hypertension                                | 1/1314 (0.1%)                             | 1/1325 (0.1%)                                |
| Height (cm) at first antenatal visit                | 167.4 (6.2)<br>167 (163; 172)<br>n=1236   | 167.6 (5.9)<br>168 (163; 172)<br>n=1246      |
| Weight (kg) at first antenatal visit                | 69.9 (14.3)<br>67 (60.; 76)<br>n=1211     | 70.7 (14.4)<br>68 (60.; 77)<br>n=1216        |
| BMI at first antenatal visit                        | 24.9 (4.7)<br>23.8 (21.6; 27.1)<br>n=1234 | 25.1 (4.9)<br>24 (21.7; 27.3)<br>n=1239      |
| BMI at first antenatal visit <30                    | 1084/1234 (87.8%)                         | 1059/1239 (85.5%)                            |
| BMI at first antenatal visit >=30                   | 150/1234 (12.2%)                          | 180/1239 (14.5%)                             |
| Last recorded weight during pregnancy, kg           | 83.5 (14.4)<br>82 (74.; 91)<br>n=1298     | 84.0 (14.6)<br>82 (74.; 92)<br>n=1308        |
| Region of birth                                     |                                           |                                              |
| Sweden                                              | 1035/1246 (83.1%)                         | 1047/1272 (82.3%)                            |
| Other Nordic countries                              | 71/1246 (5.7%)                            | 82/1272 (6.4%)                               |
| Europe outside Nordic countries                     | 20/1246 (1.6%)                            | 18/1272 (1.4%)                               |
| Outside Europe                                      | 120/1246 (9.6%)                           | 125/1272 (9.8%)                              |
| Highest education                                   |                                           |                                              |
| Less than 9 years compulsory school                 | 7/1177 (0.6%)                             | 10/1217 (0.8%)                               |
| 9 years compulsory school                           | 46/1177 (3.9%)                            | 45/1217 (3.7%)                               |

| <b>Variable</b>                                                                                                                                                                                                                                                                                                                                             | <b>Induction group<br/>(n=1333)</b> | <b>Expectant<br/>management<br/>group<br/>(n=1351)</b> |
|-------------------------------------------------------------------------------------------------------------------------------------------------------------------------------------------------------------------------------------------------------------------------------------------------------------------------------------------------------------|-------------------------------------|--------------------------------------------------------|
| <b>High school 9 to 12 years</b>                                                                                                                                                                                                                                                                                                                            | 365/1177 (31.0%)                    | 395/1217 (32.5%)                                       |
| <b>University or corresponding</b>                                                                                                                                                                                                                                                                                                                          | 759/1177 (64.5%)                    | 767/1217 (63.0%)                                       |
| <b>Employment status</b>                                                                                                                                                                                                                                                                                                                                    |                                     |                                                        |
| <b>Employed</b>                                                                                                                                                                                                                                                                                                                                             | 1063/1251 (85.0%)                   | 1082/1276 (84.8%)                                      |
| <b>Student</b>                                                                                                                                                                                                                                                                                                                                              | 97/1251 (7.8%)                      | 99/1276 (7.8%)                                         |
| <b>Maternity leave</b>                                                                                                                                                                                                                                                                                                                                      | 45/1251 (3.6%)                      | 52/1276 (4.1%)                                         |
| <b>Unemployed</b>                                                                                                                                                                                                                                                                                                                                           | 16/1251 (1.3%)                      | 18/1276 (1.4%)                                         |
| <b>Sick leave</b>                                                                                                                                                                                                                                                                                                                                           | 15/1251 (1.2%)                      | 9/1276 (0.7%)                                          |
| <b>Other</b>                                                                                                                                                                                                                                                                                                                                                | 15/1251 (1.2%)                      | 16/1276 (1.3%)                                         |
| <b>Cohabitation with partner</b>                                                                                                                                                                                                                                                                                                                            | 1174/1312 (89.5%)                   | 1184/1325 (89.4%)                                      |
| <b>Living alone</b>                                                                                                                                                                                                                                                                                                                                         | 19/1312 (1.4%)                      | 21/1325 (1.6%)                                         |
| <b>Mode of conception</b>                                                                                                                                                                                                                                                                                                                                   |                                     |                                                        |
| <b>Assisted conception (IVF/ICSI)</b>                                                                                                                                                                                                                                                                                                                       | 62/1333 (4.7%)                      | 53/1351 (3.9%)                                         |
| <b>Subfertility</b>                                                                                                                                                                                                                                                                                                                                         | 151/1207 (12.5%)                    | 143/1173 (12.2%)                                       |
| BMI=body mass index, IVF= in vitro fertilization, ICSI=intracytoplasmic sperm injection<br>For categorical variables n/N (%) is presented.<br>For continuous variables Mean (standard deviation [SD]) / Median (interquartile range [IQR] Q1; Q3) / n= is presented.<br>*alcohol screening by AUDIT tool according to antenatal care routines <sup>20</sup> |                                     |                                                        |

Supplementary Table D Delivery outcomes in per protocol population

| Variable                                                                 | Induction group<br>(n=1333)                   | Expectant<br>management<br>group<br>(n=1351) | Relative Risk<br>(95% CI) | P value | Difference<br>between<br>groups<br>Mean (95%<br>CI) |
|--------------------------------------------------------------------------|-----------------------------------------------|----------------------------------------------|---------------------------|---------|-----------------------------------------------------|
| <b>Gestational age at delivery (days)</b>                                | 288.7 (1.1)<br>289<br>(288; 289)<br>n=1333    | 291.7 (2.7)<br>292<br>(289; 294)<br>n=1351   |                           |         | -3.03 (-3.19 to<br>-2.88)                           |
| <b>Time from randomisation to<br/>delivery (days)</b>                    | 1.63 (1.03)<br>2<br>(1; 2)<br>n=1333          | 4.67 (2.65)<br>4<br>(2; 7)<br>n=1351         |                           |         | -3.04 (-3.19 to<br>-2.89)                           |
| <b>Time from admittance to labour<br/>ward to delivery (hours)</b>       | 20.1 (14.9)<br>16.1<br>(9.2; 27.8)<br>n=1332  | 13.6 (12.2)<br>10.4<br>(4.6; 18.9)<br>n=1350 |                           | <0.001  | 6.57 (5.53 to<br>7.59)                              |
| <b>Onset of birth process</b>                                            |                                               |                                              |                           |         |                                                     |
| <b>Spontaneous</b>                                                       | 182/1333 (13.7%)                              | 917/1351 (67.9%)                             |                           |         |                                                     |
| <b>Scheduled caesarean delivery</b>                                      | 5/1333 (0.4%)                                 | 2/1351 (0.1%)                                |                           |         |                                                     |
| <b>Induction</b>                                                         | 1146/1333 (86.0%)                             | 432/1351 (32.0%)                             |                           |         |                                                     |
| <b>Mode of induction</b>                                                 |                                               |                                              |                           |         |                                                     |
| <b>Cervical ripening</b>                                                 | 878/1146 (76.6%)                              | 325/432 (75.2%)                              |                           |         |                                                     |
| <b>Amniotomy without oxytocin</b>                                        | 129/1146 (11.3%)                              | 42/432 (9.7%)                                |                           |         |                                                     |
| <b>Amniotomy with oxytocin</b>                                           | 139/1146 (12.1%)                              | 65/432 (15.0%)                               |                           | 0.24    |                                                     |
| <b>Cervical ripening</b>                                                 |                                               |                                              |                           |         |                                                     |
| <b>First method mechanical</b>                                           | 334/878 (38.0%)                               | 118/325 (36.3%)                              |                           |         |                                                     |
| <b>First method pharmacological</b>                                      | 544/878 (62.0%)                               | 207/325 (63.7%)                              | 0.97 (0.88 to<br>1.07)    | 0.63    |                                                     |
| <b>Indication for induction</b>                                          |                                               |                                              |                           |         |                                                     |
| <b>Randomisation to 41 weeks and<br/>induction according to protocol</b> | 1145/1146 (99.9%)                             | 0/432 (0.0%)                                 |                           |         |                                                     |
| <b>Randomisation to 42 weeks and<br/>induction according to protocol</b> | 0/1146 (0.0%)                                 | 373/432 (86.3%)                              |                           |         |                                                     |
| <b>Maternal condition</b>                                                | 1/1146 (0.1%)                                 | 41/432 (9.5%)                                |                           |         |                                                     |
| <b>Fetal condition</b>                                                   | 0/1146 (0.0%)                                 | 18/432 (4.2%)                                |                           |         |                                                     |
| <b>Labour</b>                                                            |                                               |                                              |                           |         |                                                     |
| <b>Duration of labour</b>                                                | 7.07 (5.42)<br>5.64<br>(2.83; 10.24)<br>n=692 | 8.37 (5.96)<br>6.9<br>(3.78; 11.53)<br>n=867 |                           | <0.001  | -1.30 (-1.87 to<br>-0.74)                           |
| <b>Use of epidural anaesthesia</b>                                       | 704/1333 (52.8%)                              | 658/1351 (48.7%)                             | 1.08 (1.01 to<br>1.17)    | 0.04    |                                                     |
| <b>Meconium stained amniotic fluid</b>                                   | 225/1192 (18.9%)                              | 317/1101 (28.8%)                             | 0.66 (0.56 to<br>0.76)    | <0.001  |                                                     |
| <b>Mode of delivery</b>                                                  |                                               |                                              |                           |         |                                                     |
| <b>Non-instrumental vaginal delivery</b>                                 | 1112/1333 (83.4%)                             | 1118/1351 (82.8%)                            | 1.01 (0.97 to<br>1.04)    | 0.68    |                                                     |
| <b>Caesarean delivery</b>                                                | 134/1333 (10.1%)                              | 144/1351 (10.7%)                             | 0.94 (0.75 to<br>1.18)    | 0.65    |                                                     |

| Variable                                                     | Induction group<br>(n=1333)                   | Expectant<br>management<br>group<br>(n=1351) | Relative Risk<br>(95% CI) | P value | Difference<br>between<br>groups<br>Mean (95%<br>CI) |
|--------------------------------------------------------------|-----------------------------------------------|----------------------------------------------|---------------------------|---------|-----------------------------------------------------|
| Assisted vaginal delivery                                    | 87/1333 (6.5%)                                | 89/1351 (6.6%)                               | 0.99 (0.74 to 1.32)       | 1.00    |                                                     |
| Emergency caesarean delivery                                 | 129/134 (96.3%)                               | 142/144 (98.6%)                              | 0.98 (0.94 to 1.01)       | 0.39    |                                                     |
| <b>Indication emergency caesarean delivery</b>               |                                               |                                              |                           |         |                                                     |
| Failed induction*                                            | 8/129 (6.2%)                                  | 7/142 (4.9%)                                 |                           |         |                                                     |
| Failure to progress at first stage                           | 55/129 (42.6%)                                | 52/142 (36.6%)                               |                           |         |                                                     |
| Fetal distress at first stage                                | 32/129 (24.8%)                                | 27/142 (19.0%)                               |                           |         |                                                     |
| Failure to progress and fetal distress at first stage        | 6/129 (4.7%)                                  | 7/142 (4.9%)                                 |                           |         |                                                     |
| Other indication at first stage                              | 5/129 (3.9%)                                  | 3/142 (2.1%)                                 |                           |         |                                                     |
| Failure to progress at second stage                          | 11/129 (8.5%)                                 | 23/142 (16.2%)                               |                           |         |                                                     |
| Fetal distress at second stage                               | 6/129 (4.7%)                                  | 8/142 (5.6%)                                 |                           |         |                                                     |
| Failure to progress and fetal distress at second stage       | 0/129 (0.0%)                                  | 3/142 (2.1%)                                 |                           |         |                                                     |
| Failure operative vaginal delivery                           | 6/129 (4.7%)                                  | 12/142 (8.5%)                                |                           | 0.26    |                                                     |
| <b>Indication assisted vaginal delivery</b>                  |                                               |                                              |                           |         |                                                     |
| Failure to progress                                          | 36/87 (41.4%)                                 | 28/89 (31.5%)                                |                           |         |                                                     |
| Fetal distress                                               | 33/87 (37.9%)                                 | 34/89 (38.2%)                                |                           |         |                                                     |
| Failure to progress and fetal distress                       | 5/87 (5.7%)                                   | 6/89 (6.7%)                                  |                           |         |                                                     |
| Maternal distress                                            | 13/87 (14.9%)                                 | 20/89 (22.5%)                                |                           |         |                                                     |
| Other                                                        | 0/87 (0.0%)                                   | 1/89 (1.1%)                                  |                           | 0.47    |                                                     |
| Duration of hospital stay from delivery to discharge (hours) | 46.3 (27.1)<br>43.6<br>(25.3; 61.6)<br>n=1286 | 47.3 (29.7)<br>45<br>(26.5; 61.2)<br>n=1305  |                           | 0.36    | -1.03 (-3.20 to 1.17)                               |
| Breast feeding at discharge from delivery hospital           | 949/979 (96.9%)                               | 961/992 (96.9%)                              | 1.00 (0.98 to 1.02)       | 1.00    |                                                     |
| Breast feeding 4 weeks after delivery                        | 806/893 (90.3%)                               | 814/927 (87.8%)                              | 1.03 (1.00 to 1.06)       | 0.11    |                                                     |

CI= confidence interval

For categorical variables n/N (%) is presented.

For continuous variables Mean (standard deviation [SD]) / Median interquartile range [IQR] Q1; Q3) / n= is presented.

\*Caesarean section performed when active labour was not reached despite different methods for induction of labour being used, usually for at least 48 hours.

**Supplementary Table E Perinatal outcome in per protocol groups**

| <b>Variable</b>                                                                                   | <b>Induction group<br/>(n=1333)</b>          | <b>Expectant management group<br/>(n=1351)</b> | <b>Relative Risk<br/>(95% CI)</b> | <b>P value</b> | <b>Difference between groups<br/>Mean (95% CI)</b> |
|---------------------------------------------------------------------------------------------------|----------------------------------------------|------------------------------------------------|-----------------------------------|----------------|----------------------------------------------------|
| <b>Primary composite outcome</b>                                                                  | 31/1333 (2.3%)                               | 31/1351 (2.3%)                                 | 1.01 (0.62 to 1.66)               | 1.00           |                                                    |
| <b>Sub-components of the primary composite perinatal outcome</b>                                  |                                              |                                                |                                   |                |                                                    |
| <b>Perinatal/neonatal mortality (stillbirth + neonatal mortality)</b>                             | 0/1333 (0.0%)                                | 6/1351 (0.4%)                                  |                                   | 0.03           |                                                    |
| <b>Stillbirth</b>                                                                                 | 0/1333 (0.0%)                                | 5/1351 (0.4%)                                  |                                   | 0.06           |                                                    |
| <b>Neonatal mortality (Live births with death day 0-27)</b>                                       | 0/1333 (0.0%)                                | 1/1346 (0.1%)                                  |                                   | 1.00           |                                                    |
| <b>Neonatal morbidity</b>                                                                         | 31/1333 (2.3%)                               | 26/1346 (1.9%)                                 | 1.21 (0.72 to 2.02)               | 0.56           |                                                    |
| <b>Sub-components of neonatal morbidity</b>                                                       |                                              |                                                |                                   |                |                                                    |
| <b>Apgar score &lt;7 at 5 minutes*</b>                                                            | 17/1333 (1.3%)                               | 16/1346 (1.2%)                                 | 1.07 (0.54 to 2.11)               | 0.98           |                                                    |
| <b>Metabolic acidosis (denominator based on validated umbilical cord blood samples at birth)†</b> | 13/645 (2.0%)                                | 10/633 (1.6%)                                  | 1.28 (0.56 to 2.89)               | 0.71           |                                                    |
| <b>Hypoxic ischaemic encephalopathy (HIE) I-III</b>                                               | 2/1333 (0.2%)                                | 3/1346 (0.2%)                                  | 0.67 (0.11 to 4.02)               | 1.00           |                                                    |
| <b>Intracranial haemorrhage</b>                                                                   | 1/1333 (0.1%)                                | 2/1346 (0.1%)                                  | 0.50 (0.05 to 5.56)               | 1.00           |                                                    |
| <b>Neonatal convulsions</b>                                                                       | 1/1333 (0.1%)                                | 3/1346 (0.2%)                                  | 0.34 (0.04 to 3.23)               | 0.63           |                                                    |
| <b>Meconium aspiration syndrome (MAS)</b>                                                         | 2/1333 (0.2%)                                | 3/1346 (0.2%)                                  | 0.67 (0.11 to 4.02)               | 1.00           |                                                    |
| <b>Mechanical ventilation within first 72 hours</b>                                               | 3/1333 (0.2%)                                | 5/1346 (0.4%)                                  | 0.61 (0.15 to 2.53)               | 0.74           |                                                    |
| <b>Obstetric brachial plexus injury</b>                                                           | 4/1333 (0.3%)                                | 1/1346 (0.1%)                                  | 4.04 (0.45 to 36.09)              | 0.37           |                                                    |
| <b>Additional secondary neonatal outcomes variables</b>                                           |                                              |                                                |                                   |                |                                                    |
| <b>Admittance to neonatal intensive care units (NICU)</b>                                         | 55/1333 (4.1%)                               | 82/1346 (6.1%)                                 | 0.68 (0.49 to 0.94)               | 0.03           |                                                    |
| <b>Apgar score &lt;4 at 5 minutes*</b>                                                            | 3/1333 (0.2%)                                | 1/1346 (0.1%)                                  | 3.04 (0.32 to 29.19)              | 0.61           |                                                    |
| <b>Therapeutic hypothermia</b>                                                                    | 1/1333 (0.1%)                                | 2/1346 (0.1%)                                  | 0.51 (0.05 to 5.58)               | 1.00           |                                                    |
| <b>Birthweight (g)</b>                                                                            | 3814 (409)<br>3804<br>(3530; 4090)<br>n=1333 | 3874 (435)<br>3860<br>(3570; 4155)<br>n=1351   |                                   | <0.001         | -60.1 (-92.0 to -28.5)                             |
| <b>Macrosomia (&gt;= 4500 g)</b>                                                                  | 64/1333 (4.8%)                               | 112/1351 (8.3%)                                | 0.58 (0.43 to 0.78)               | <0.001         |                                                    |
| <b>Neonatal jaundice requiring phototherapy or exchange transfusion</b>                           | 16/1333 (1.2%)                               | 32/1346 (2.4%)                                 | 0.51 (0.28 to 0.92)               | 0.03           |                                                    |
| <b>Pneumonia</b>                                                                                  | 8/1333 (0.6%)                                | 13/1346 (1.0%)                                 | 0.62 (0.26 to 1.50)               | 0.40           |                                                    |



| Variable                                                   | Induction group (n=1333)           | Expectant management group (n=1351) | Relative Risk (95% CI) | P value | Difference between groups Mean (95% CI) |
|------------------------------------------------------------|------------------------------------|-------------------------------------|------------------------|---------|-----------------------------------------|
| Sepsis                                                     | 9/1333 (0.7%)                      | 20/1346 (1.5%)                      | 0.46 (0.21 to 1.00)    | 0.07    |                                         |
| <b>Exploratory neonatal outcome variables</b>              |                                    |                                     |                        |         |                                         |
| Days at neonatal intensive care units (NICU)               | 3.38 (2.97)<br>2<br>(1; 6)<br>n=55 | 4.59 (5.64)<br>3<br>(1; 6)<br>n=81‡ |                        | 0.15    | -1.21 (-2.75 to 0.19)                   |
| Admittance to neonatal intensive care units (NICU) >4 days | 34/55 (61.8%)                      | 45/81 (55.6%)                       | 1.11 (0.84 to 1.48)    | 0.58    |                                         |
| Hypoglycaemia§                                             | 22/1333 (1.7%)                     | 20/1346 (1.5%)                      | 1.11 (0.61 to 2.03)    | 0.84    |                                         |
| Birth trauma¶                                              | 0/1333 (0.0%)                      | 1/1346 (0.1%)                       |                        | 1.00    |                                         |
| Small for gestational age (SGA)**                          | 9/1333 (0.7%)                      | 21/1351 (1.6%)                      | 0.43 (0.20 to 0.94)    | 0.045   |                                         |
| Large for gestational age (LGA)**                          | 20/1333 (1.5%)                     | 24/1351 (1.8%)                      | 0.84 (0.47 to 1.52)    | 0.68    |                                         |
| Any major birth defect††                                   | 14/1333 (1.1%)                     | 17/1351 (1.3%)                      | 0.83 (0.41 to 1.69)    | 0.75    |                                         |
| Female                                                     | 576/1333 (43.2%)                   | 612/1351 (45.3%)                    | 0.95 (0.88 to 1.04)    | 0.29    |                                         |

CI=confidence interval

For categorical variables n/N (%) is presented.

For continuous variables Mean (standard deviation [SD]) / Median interquartile range [IQR] Q1; Q3) / n= is presented.

\*Apgar score of live births

†validated umbilical cord samples defined as values of arterial pH < venous pH and values of arterial pCO<sub>2</sub> > venous pCO<sub>2</sub>

‡one infant with only home based neonatal care

§hypoglycaemia defined as P-glucose concentration < 2,6 mmol/L after 3 hours

¶defined as any of long bone fracture, clavicular fracture, skull fracture, other neurological injury, retinal haemorrhage, facial nerve palsy

\*\*SGA and LGA defined as  $\leq 2$  SD and  $\geq 2$  SD, respectively, according to the Swedish sex specific reference<sup>17</sup>

††minor birth defects according to EUROCAT definition excluded<sup>21</sup>

**Supplementary Table F Maternal adverse outcomes in per protocol population**

| <b>Variable</b>                                            | <b>Induction group<br/>(n=1333)</b> | <b>Expectant<br/>management<br/>group<br/>(n=1351)</b> | <b>Relative Risk<br/>(95% CI)</b> | <b>P value</b> |
|------------------------------------------------------------|-------------------------------------|--------------------------------------------------------|-----------------------------------|----------------|
| <b>Secondary maternal outcomes</b>                         |                                     |                                                        |                                   |                |
| <b>Chorioamnionitis</b>                                    | 2/1333 (0.2%)                       | 6/1351 (0.4%)                                          | 0.34 (0.07 to 1.67)               | 0.30           |
| <b>Shoulder dystocia</b>                                   | 6/1333 (0.5%)                       | 4/1351 (0.3%)                                          | 1.52 (0.43 to 5.38)               | 0.74           |
| <b>Perineal lacerations III-IV</b>                         | 35/1333 (2.6%)                      | 50/1351 (3.7%)                                         | 0.71 (0.46 to 1.09)               | 0.14           |
| <b>Postpartum haemorrhage (&gt;1000 ml)</b>                | 134/1333 (10.1%)                    | 143/1351 (10.6%)                                       | 0.95 (0.76 to 1.19)               | 0.70           |
| <b>Wound infection</b>                                     | 4/1333 (0.3%)                       | 3/1351 (0.2%)                                          | 1.35 (0.30 to 6.03)               | 0.99           |
| <b>Urinary tract infection incl.<br/>pyelonephritis</b>    | 5/1333 (0.4%)                       | 7/1351 (0.5%)                                          | 0.72 (0.23 to 2.28)               | 0.79           |
| <b>Endometritis</b>                                        | 17/1333 (1.3%)                      | 5/1351 (0.4%)                                          | 3.45 (1.27 to 9.31)               | 0.02           |
| <b>Sepsis</b>                                              | 0/1333 (0.0%)                       | 0/1351 (0.0%)                                          |                                   | 1.00           |
| <b>Exploratory maternal outcomes</b>                       |                                     |                                                        |                                   |                |
| <b>Preeclampsia/gestational<br/>hypertension/eclampsia</b> | 17/1333 (1.3%)                      | 41/1351 (3.0%)                                         | 0.42 (0.24 to 0.74)               | 0.002          |
| <b>Uterine rupture</b>                                     | 0/1333 (0.0%)                       | 0/1351 (0.0%)                                          |                                   | 1.00           |
| <b>Cervical laceration</b>                                 | 5/1333 (0.4%)                       | 8/1351 (0.6%)                                          | 0.63 (0.21 to 1.93)               | 0.60           |
| <b>Venous thromboembolism</b>                              | 0/1333 (0.0%)                       | 1/1351 (0.1%)                                          |                                   | 1.00           |
| <b>Maternal admission to intensive care<br/>unit</b>       | 2/1333 (0.2%)                       | 0/1351 (0.0%)                                          |                                   | 0.49           |
| <b>Maternal death</b>                                      | 0/1333 (0.0%)                       | 0/1351 (0.0%)                                          |                                   | 1.00           |

CI= confidence interval

For categorical variables n/N (%) is presented.

For continuous variables Mean (standard deviation [SD]) / Median interquartile range [IQR] Q1; Q3) / n= is presented.
